# Supplementary material
Source: PubMed Central journal article supplement (PMC7127962)

1 **Supplementary Figure Legends:**

2 **Supplementary Figure S1. OGT and O-GlcNAc not regulated by loss of cell adhesion in**

3 **cancer cells. A.** Cell lysates from MCF7 cells attached (Adherence +) or placed in cell suspension  
4 (anoikis) (Adherence -) for 24 or 48 hours in regular media were collected for immunoblot analysis  
5 with the indicated antibodies. **B.** Cell lysates from MDA-MB-231 cells attached (Adherence +) or  
6 placed in cell suspension (anoikis) (Adherence -) for 24 or 48 hours in regular media were  
7 collected for immunoblot analysis with the indicated antibodies.

8  
9 **Supplementary Figure S2. OGT inhibition attenuates mammosphere formation and**

10 **CD44<sup>H</sup>CD24<sup>L</sup> TIC population. A.** Cell lysates from MCF7 cells expressing control or OGT  
11 shRNA were collected for immunoblot analysis with the indicated antibodies (left). Representative  
12 images of mammospheres (middle) and quantification of mammosphere forming efficiency (MFE)  
13 (right) in MCF7 cells stably expressing control and OGT shRNA. **B.** Representative flow  
14 cytometry analysis of CD44<sup>H</sup>CD24<sup>L</sup> population (left) in MCF7 cells stably expressing control,  
15 OGT-1 shRNA and quantified (right). **C.** Cell lysates from SUM159 cells expressing control or  
16 OGT shRNA were collected for immunoblot analysis with the indicated antibodies (left).  
17 Representative images of mammospheres (middle) and quantification of mammosphere forming  
18 efficiency (MFE) (right) in SUM159 cells stably expressing control and OGT-1 and OGT-2  
19 shRNA. **D.** Representative flow cytometry analysis of CD44<sup>H</sup>CD24<sup>L</sup> population (left) in SUM159  
20 cells stably expressing control, OGT-1 shRNA and quantified (right). **E.** Cell lysates from MDA-  
21 MB-157 cells expressing control or OGT shRNA were collected for immunoblot analysis with the  
22 indicated antibodies (left). Representative flow cytometry analysis of CD44<sup>H</sup>CD24<sup>L</sup> population  
23 (middle) in MDA-MB-157 cells stably expressing control, OGT-1 shRNA and quantified (right).

24 **F.** Cell lysates from SUM159 cells expressing control or OGT shRNA were collected for  
25 immunoblot analysis with the indicated antibodies (left). Annexin/PI staining measuring early and  
26 late apoptosis in SUM159 mammospheres upon OGT knockdown (right). Student's t-test reported  
27 as mean  $\pm$  SEM. \* = p-value < 0.05.

28

29 **Supplementary Figure S3. OGT inhibition attenuates mammosphere formation and**  
30 **CD44<sup>H</sup>CD24<sup>L</sup> TIC population.** **A.** Cell lysates from MCF7 cells treated with DMSO and OGT  
31 inhibitor Ac-5s-GlcNAc (100  $\mu$ M) (left) were collected for immunoblot analysis with the indicated  
32 antibodies. Representative mammosphere images (center) and quantified MFE post 7 day in  
33 mammosphere culture (right). **B.** Same as in A except for using SUM159 cells. **C.** Same as in A  
34 except using HCI-10 cells except MFE post 5 day in mammosphere culture. Student's t-test  
35 reported as mean  $\pm$  SEM. \* = p-value < 0.05.

36

37 **Supplementary Figure S4. Elevated OGT and O-GlcNAc ameliorate mammosphere**  
38 **formation and CD44<sup>H</sup>CD24<sup>L</sup> TIC population.** **A.** Cell lysates from MCF7 cells stably  
39 overexpressing control or OGT were collected for immunoblot analysis with indicated antibodies  
40 (left). Representative images of mammospheres formation of MCF7 cells stably overexpressing  
41 control or OGT (middle) and quantification of MFE (right). **B.** Representative flow cytometry  
42 measuring CD44<sup>H</sup>CD24<sup>L</sup> population from MCF7 cells stably overexpressing control or OGT (left)  
43 and quantification (right). **C.** Same as in A except using SUM159 cells. **D.** Same as in B except  
44 using SUM159 cells. **E.** Cell lysates from MCF7 cells treated with DMSO and OGA inhibitor  
45 Thiamet-G (1  $\mu$ M) were collected for immunoblot analysis with indicated antibodies (left),

46 representative mammospheres formation (center) and quantified MFE following 7day  
47 mammosphere culture (right). Student's t-test reported as mean  $\pm$  SEM. \* = p-value < 0.05.

48  
49 **Supplementary Figure S5. OGT/O-GlcNAc modulation affects NANOG-GFP+ and ALDH+**  
50 **TIC population. A.** Cell lysates from SUM159 cells expressing control, OGT-1, or OGT-2  
51 shRNA were collected for immunoblot analysis with the indicated antibodies (top). Quantified  
52 flow cytometry graph showing NANOG-GFP+ population in SUM159 cells stably expressing  
53 control, OGT-1 or OGT-2 shRNA (bottom). **B.** Same as in A except for using MDA-MB-157 cells.  
54 **C.** Cell lysates from MCF7 cells expressing control or OGT-1 shRNA were collected for  
55 immunoblot analysis with the indicated antibodies (top). Quantified flow cytometry graph showing  
56 NANOG-GFP+ population in MCF7 cells stably expressing control or OGT-1 shRNA (bottom).  
57 **D.** Quantified flow cytometry graph showing NANOG-GFP+ population in SUM159 cells stably  
58 overexpressing control or OGT. **E.** Cell lysates from MDA-MB-157 cells stably overexpressing  
59 control or OGT were collected for immunoblot analysis with indicated antibodies (top). Quantified  
60 flow cytometry graph showing NANOG-GFP+ population in MDA-MB-157 cells stably  
61 overexpressing control or OGT (bottom). Student's t-test reported as mean  $\pm$  SEM. \* = p-value <  
62 0.05.

63  
64 **Supplementary Figure S6. OGT/O-GlcNAc modulation affects NANOG-GFP+ TIC**  
65 **population. A.** Cell lysates from MDA-MB-231 cells treated with DMSO or OGA inhibitor  
66 NButGT (100  $\mu$ M) were collected for immunoblot analysis with indicated antibodies (left).  
67 Quantified flow cytometry graph showing NANOG-GFP+ population in MDA-MB-231 cells  
68 following 48hr treatment with DMSO or NButGT (100  $\mu$ M) (right). **B.** Same as in A except using

69 SUM159 cells. **C.** Same as in A except using MDA-MB-157 cells. **D.** Same as in A except using  
70 MCF7 cells. **E.** Quantified flow cytometry graph showing ALDH<sup>+</sup> population in MDA-MB-231  
71 cells stably expressing shRNA control or OGT shRNA. **F.** Quantified flow cytometry graph  
72 showing ALDH<sup>+</sup> population in MCF7 cells stably expressing shRNA control or OGT shRNA. **G.**  
73 Quantified flow cytometry graph showing ALDH<sup>+</sup> population in MDA-MB-157 cells stably  
74 expressing shRNA control or OGT shRNA. Student's t-test reported as mean ± SEM. \* = p-value  
75 < 0.05.

76

77 **Supplementary Figure S7. OGT regulates EMT and stem cell markers.** **A.** Quantification of  
78 fold change in indicated proteins levels in MCF7 cells expressing shRNA control or OGT shRNA.  
79 **B.** Quantification of fold change in indicated proteins levels in MCF7 cells overexpressing control  
80 or OGT. **C.** Quantification of fold change in indicated proteins levels in MDA-MB-231 cells  
81 expressing shRNA control or OGT shRNA. **D.** Quantification of fold change in indicated proteins  
82 levels in MDA-MB-231 cells overexpressing control or OGT. **E.** Quantification of fold change in  
83 indicated proteins levels in SUM159 cells expressing shRNA control or OGT shRNA. **F.**  
84 Quantification of fold change in indicated proteins levels in SUM159 cells overexpressing control  
85 or OGT.

86

87 **Supplementary Figure S8. OGT regulates EMT and stem cell markers.**

88 **A.** Measurement of relative mRNA expression of indicated genes from control or stable OGT  
89 shRNA expressing MDA-MB-231 cells using qRT-PCR. All expression is normalized to  
90 cyclophilin A internal control and to MDA-MB-231 shRNA control samples. **B.** Measurement of  
91 relative mRNA expression of indicated genes from control or stable OGT overexpressing MDA-

92 MB-231 cells. **C.** Measurement of relative mRNA expression of indicated genes from control or  
93 stable OGT shRNA expressing SUM159 cells. **D.** Measurement of relative mRNA expression of  
94 indicated genes from control or stable OGT overexpressing SUM159 cells. Student's t-test  
95 reported as mean  $\pm$  SEM. \* = p-value < 0.05.

96

97 **Supplementary Figure S9. KLF8 is a critical regulator of mammosphere formation and**

98 **required for OGT-mediated mammosphere growth. A.** Pathway enrichment plot with pathway

99 names on X-axis and number of differentially expressed genes on Y-axis: upregulated genes (red),

100 downregulated genes (blue). **B.** Cell lysates from MDA-MB-231, HCI-10, MCF7 cells grown in

101 adherent (adh) and mammosphere (mamm) culture were collected for immunoblot analysis with

102 indicated antibodies. **C.** Cell lysates from SUM159 cells stably expressing control or two different

103 KLF8 shRNA were collected for immunoblot analysis with indicated antibodies (top),

104 representative mammosphere images (bottom). **D.** Cell lysates from MDA-MB-231 cells stably

105 expressing control or two different KLF8 shRNA were collected for immunoblot analysis with

106 indicated antibodies (top) and quantified MFE in KLF8 knockdown in MDA-MB-231 cells using

107 two shRNA constructs (bottom). **E.** Cell lysates from SUM159 cells with KLF8 knockdown

108 treated with DMSO or NButGT (100  $\mu$ M) for 48hrs were collected for immunoblot analysis with

109 indicated antibodies.

110

111 **Supplementary Figure S10. Regulation of KLF8 by OGT in breast cancer cells. A.** Cell

112 lysates from MDA-MB-231 cells expressing control, OGT-1 or OGT-2 shRNA were collected for

113 immunoblot analysis with the indicated antibodies. **B.** Cell lysates from SUM159 cells expressing

114 control, OGT-1 or OGT-2 shRNA were collected for immunoblot analysis with the indicated

115 antibodies. **C.** Cell lysates from MCF7 cells expressing control, OGT-1 or OGT-2 shRNA were  
116 collected for immunoblot analysis with the indicated antibodies. **D.** Measurement of relative  
117 mRNA expression of indicated genes from control or stable OGT shRNA expressing MDA-MB-  
118 231 cells using qRT-PCR. All expression is normalized to cyclophilin A internal control and to  
119 MDA-MB-231 shRNA control samples. Student's t-test reported as mean  $\pm$  SEM. \* = p-value <  
120 0.05.

121

122 **Supplementary Figure S11. Breast cancer patients with high KLF8 have poor overall**  
123 **survival.**

124 **A.** Kaplan-Meier overall survival curve for Luminal A breast cancer patients according to KLF8  
125 expression levels. **B.** Kaplan-Meier overall survival curve for HER2-positive breast cancer patients  
126 according to KLF8 expression levels. **C.** Kaplan-Meier overall survival curve for Mesenchymal  
127 breast cancer patients according to KLF8 expression levels. **D.** Kaplan-Meier overall survival  
128 curve for Basal-like 2 breast cancer patients according to KLF8 expression levels.

129

130 **Table S1.** List of upregulated and downregulated genes.

131

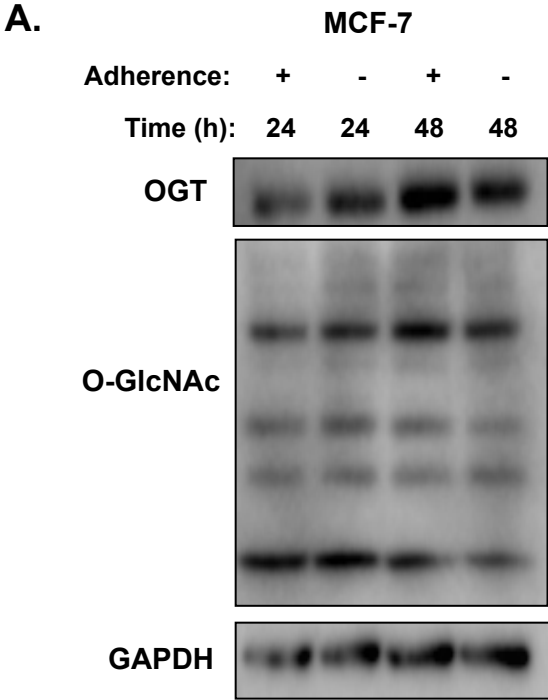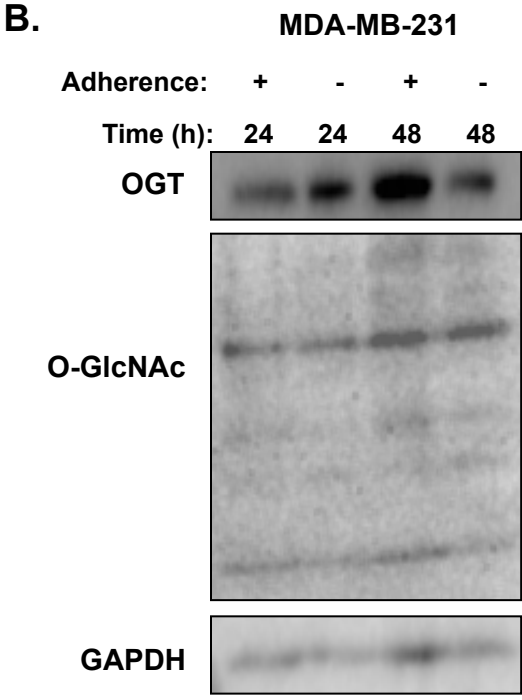

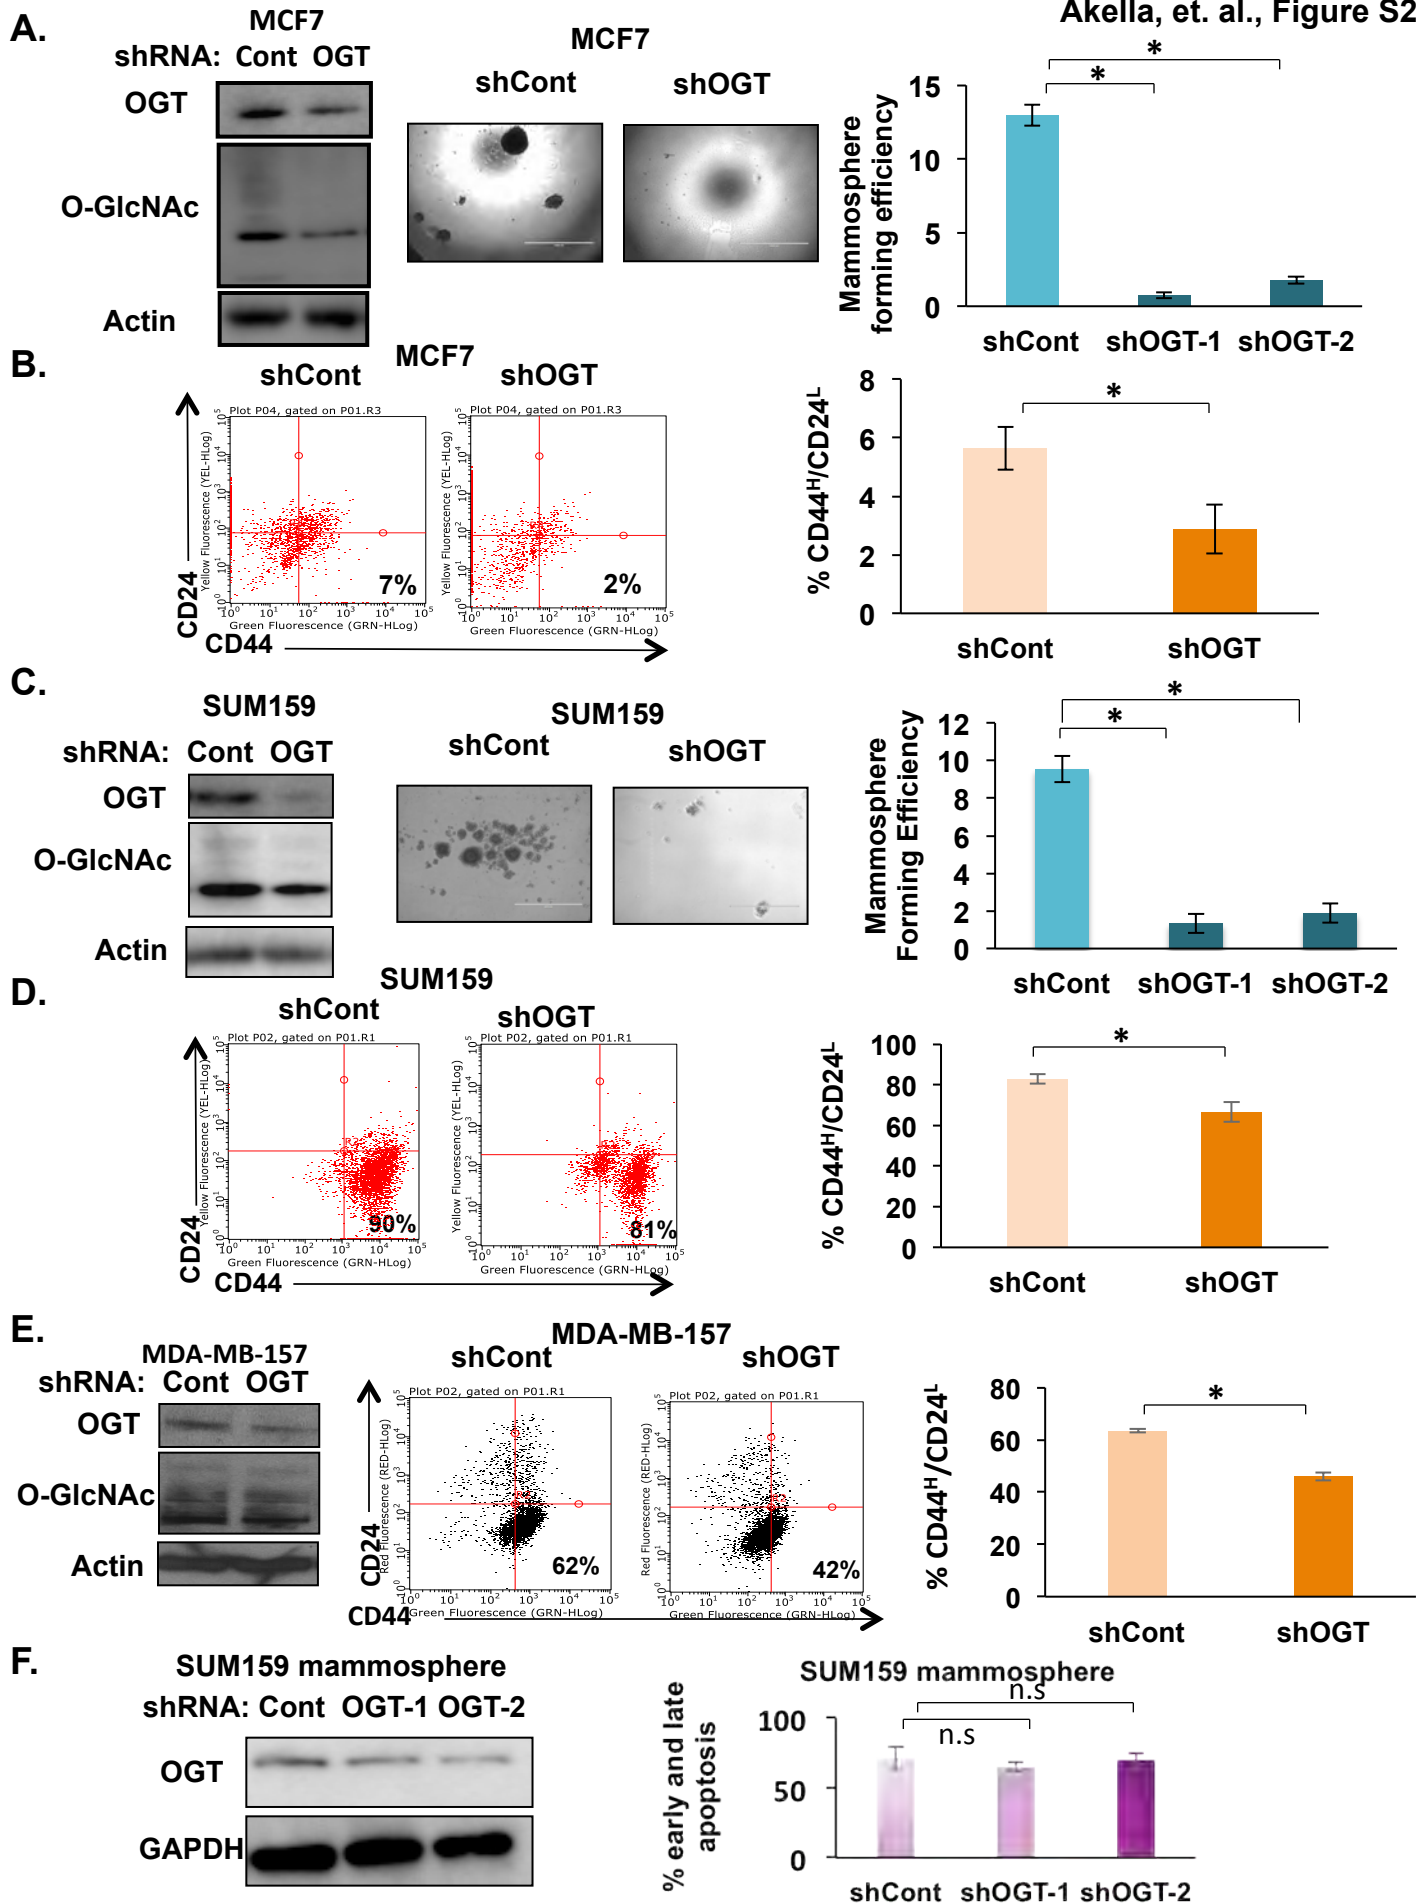



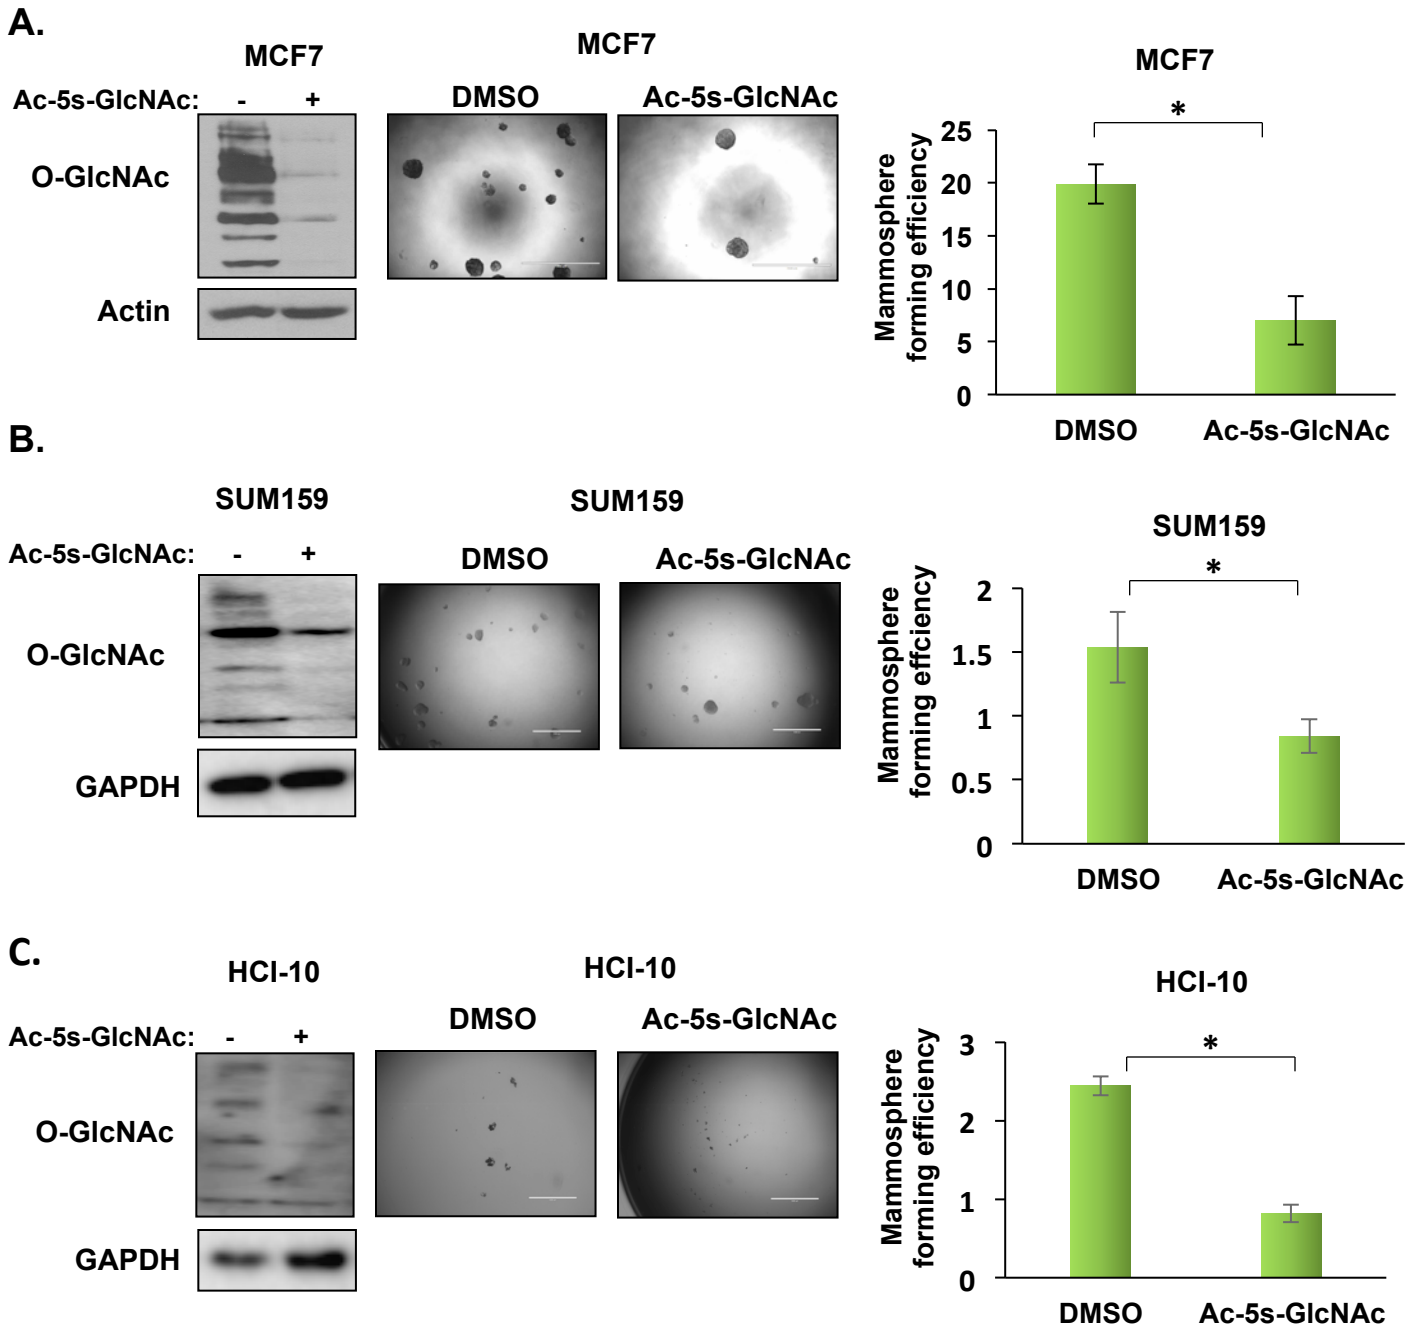

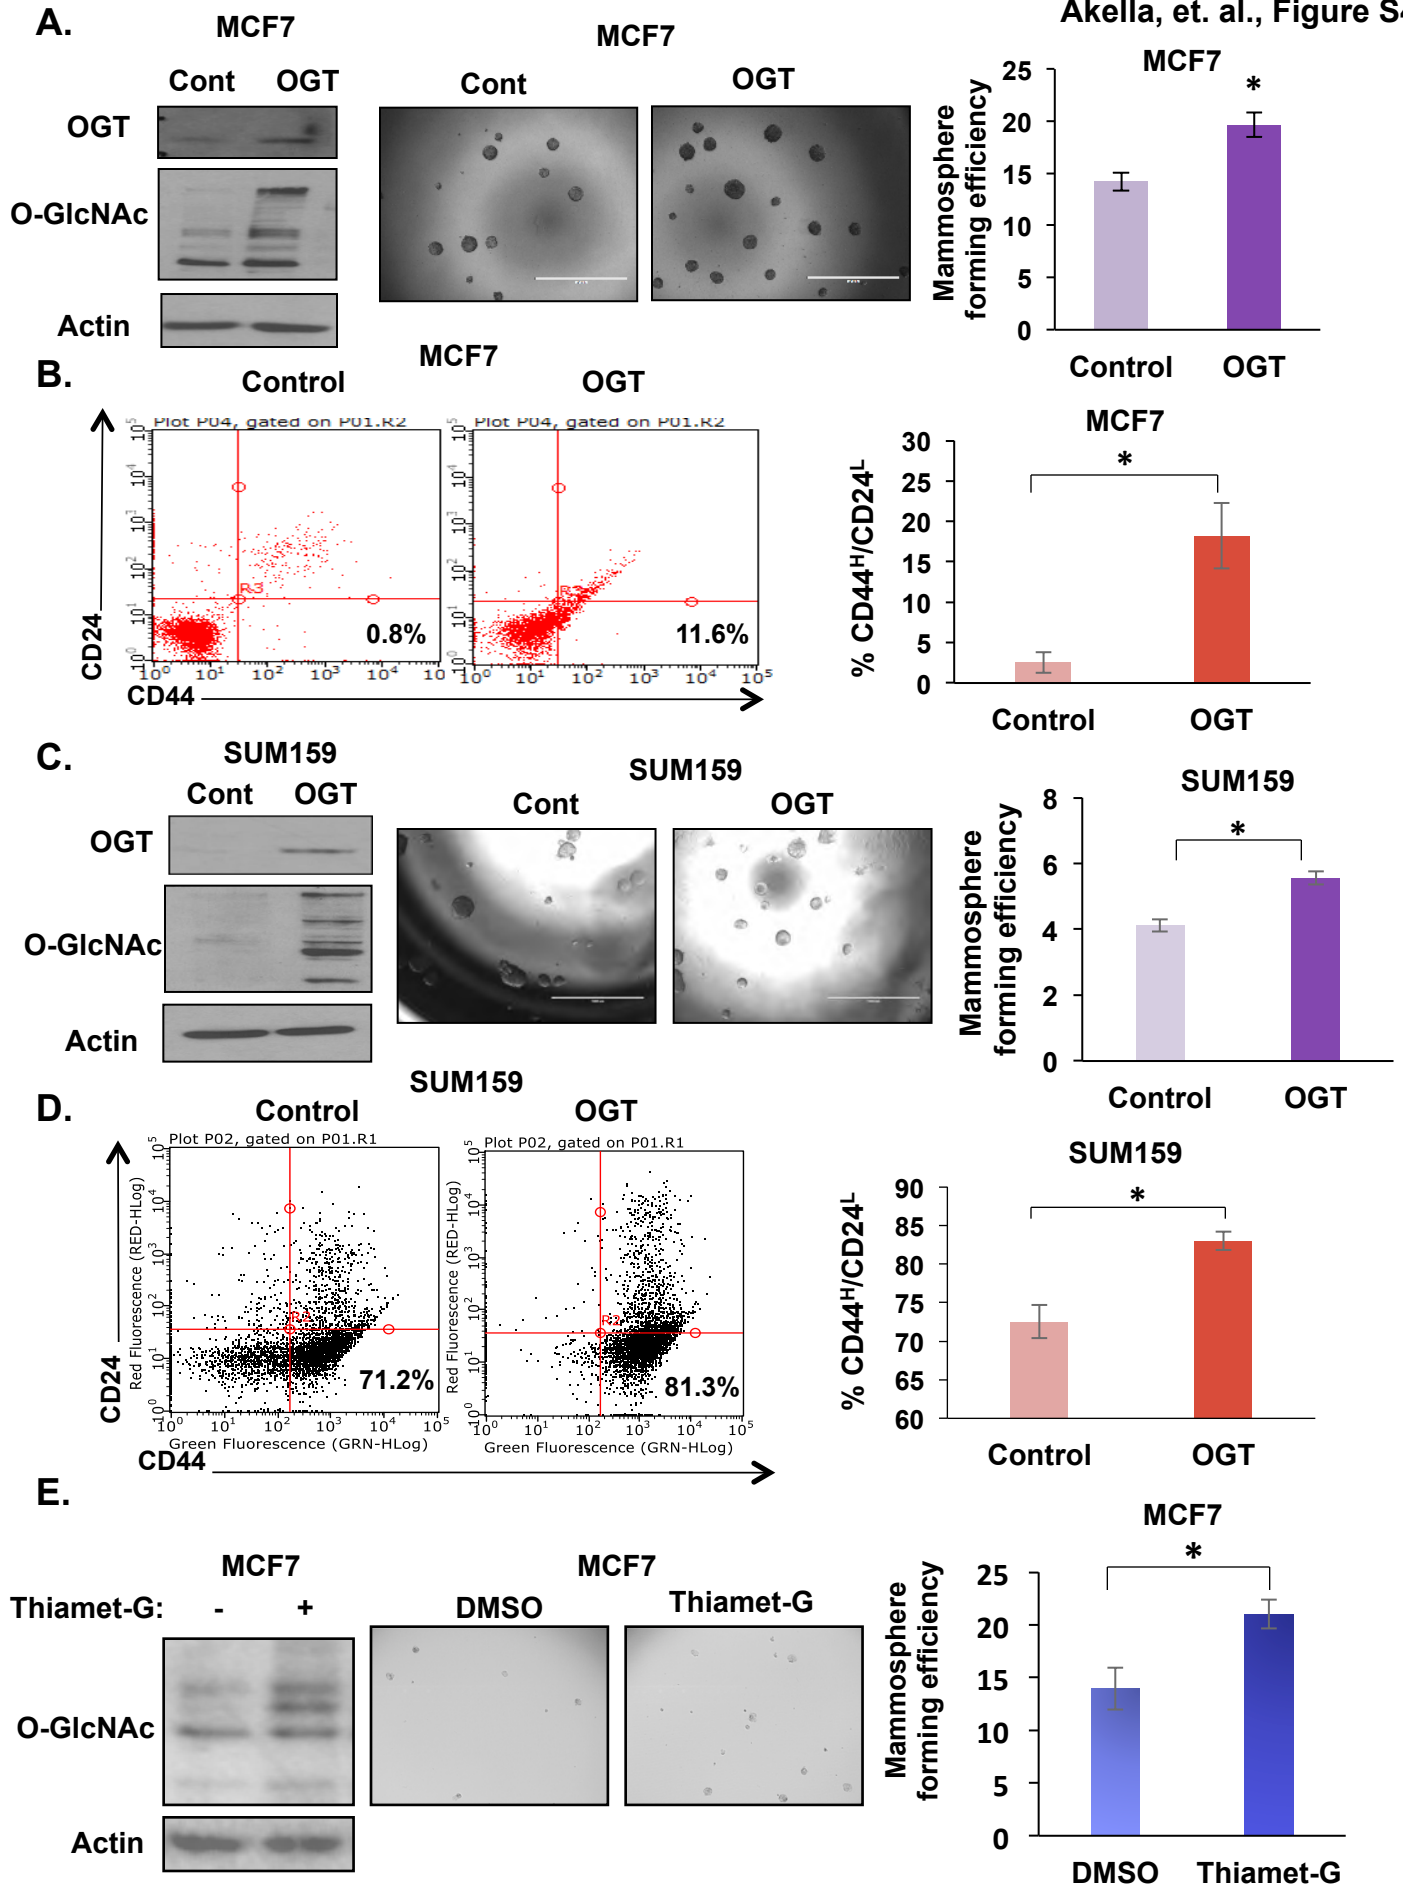

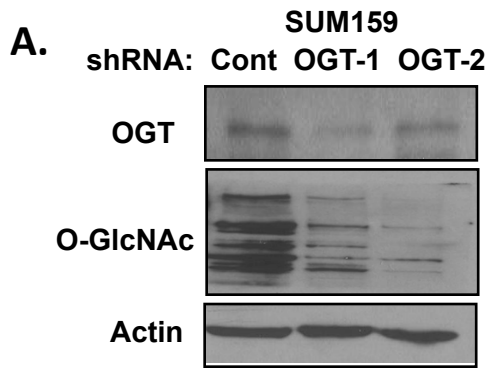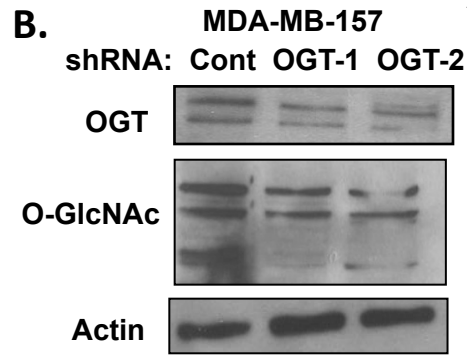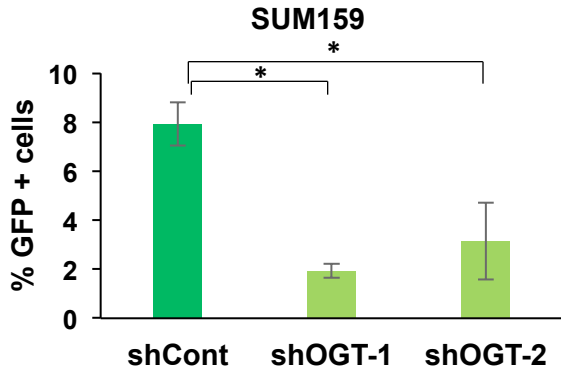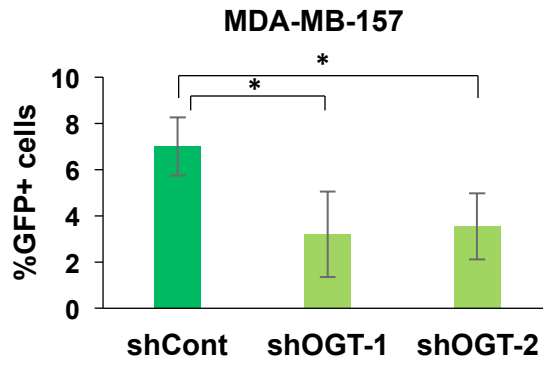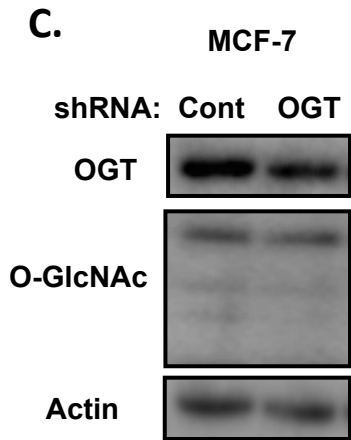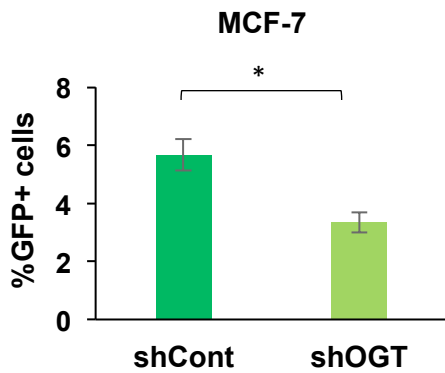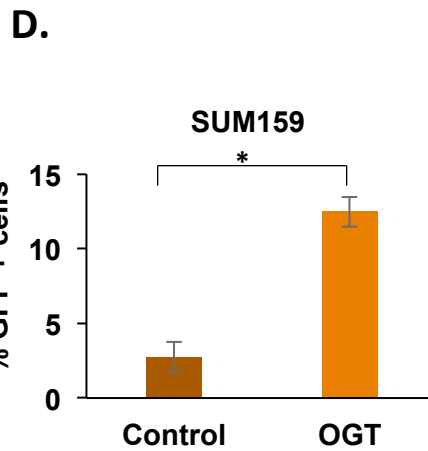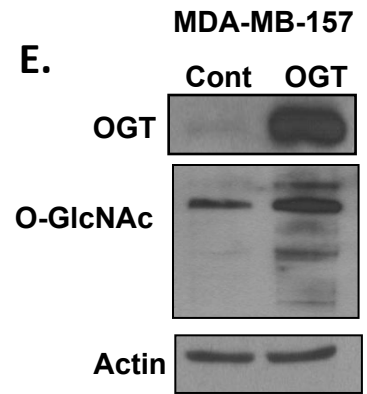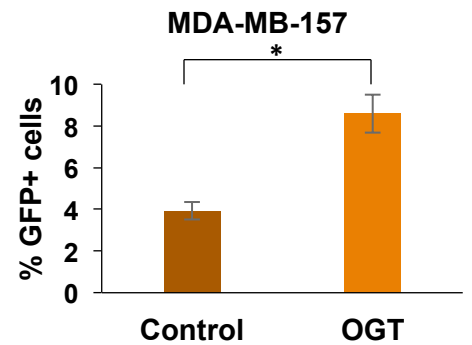

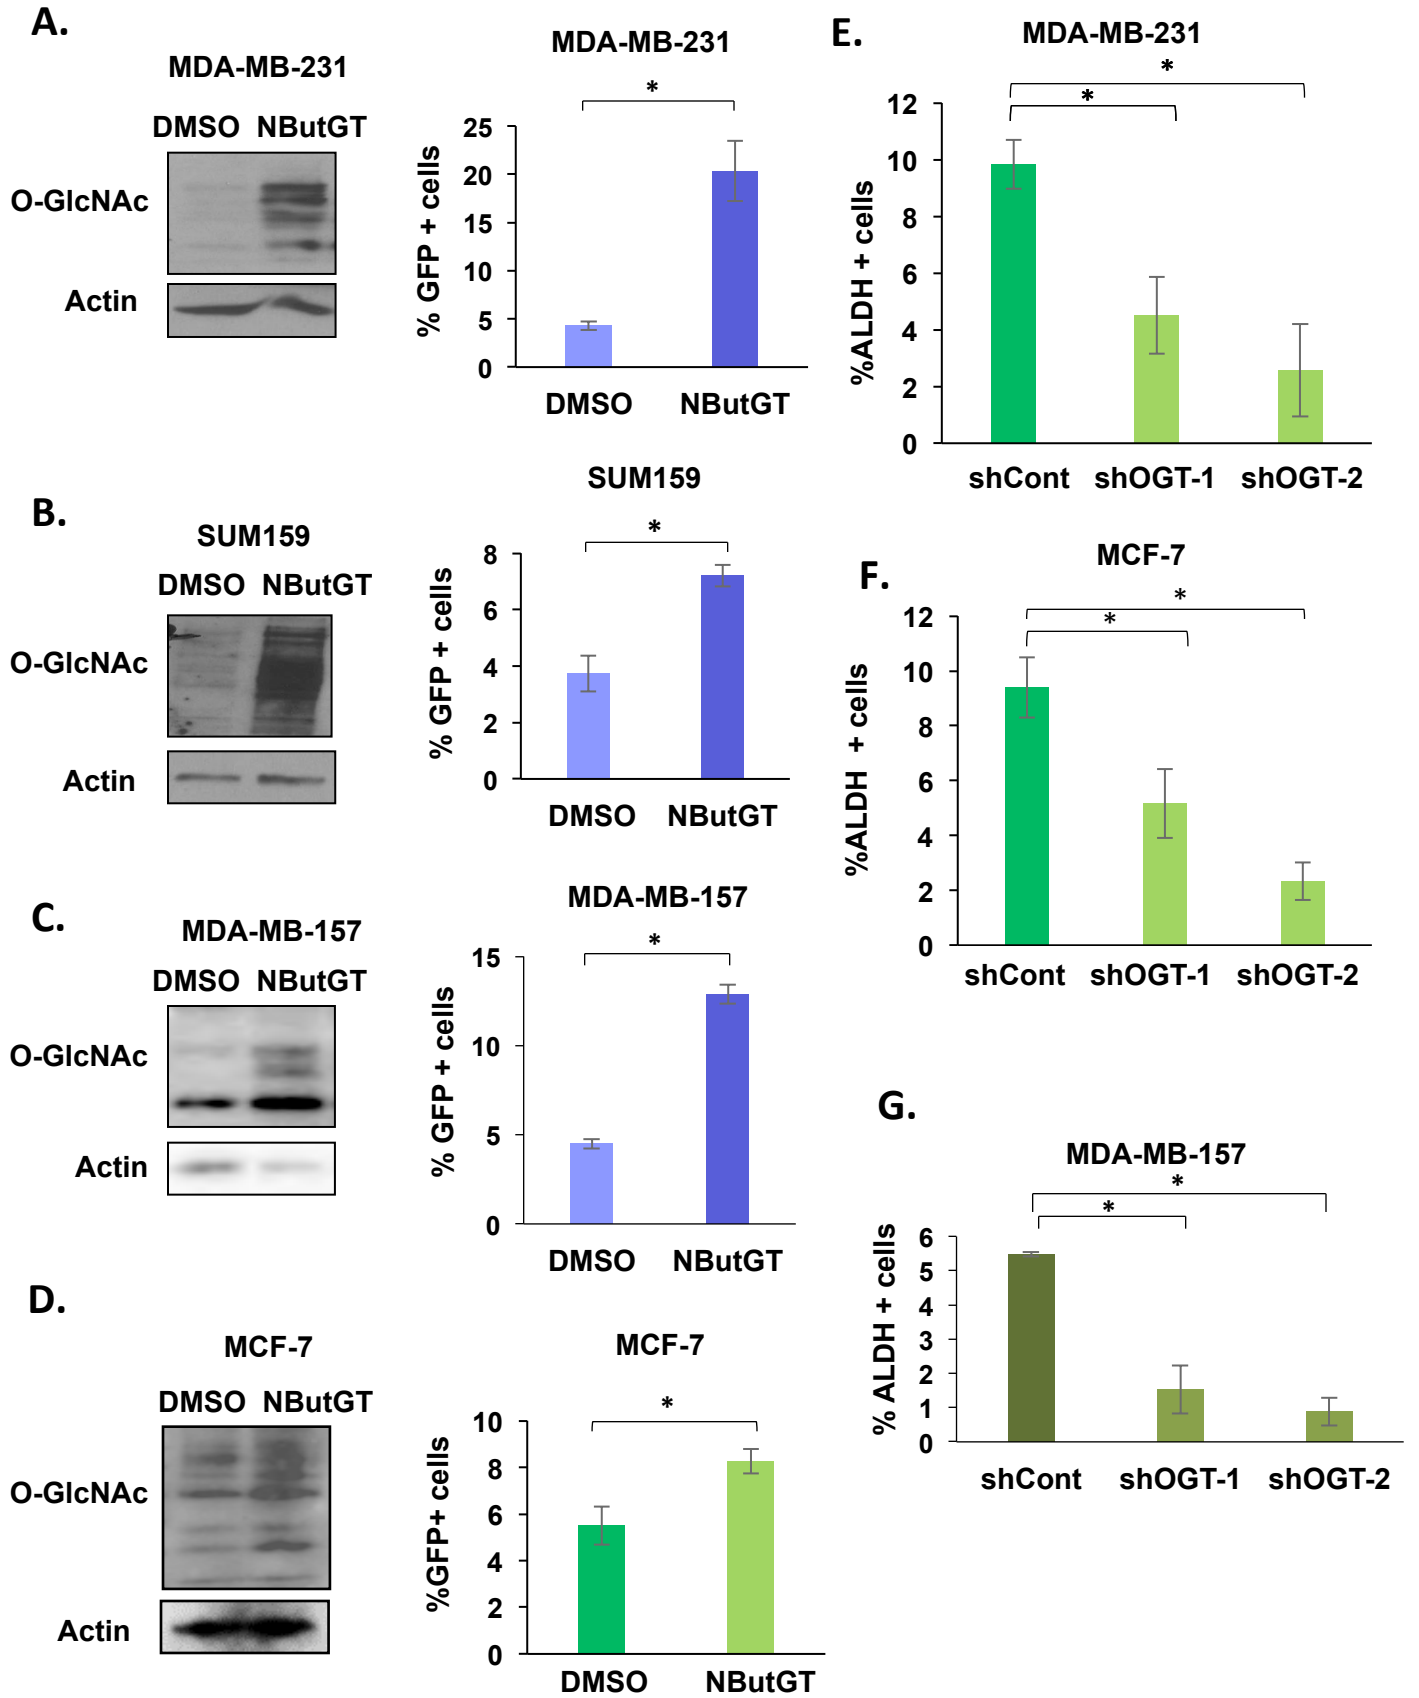

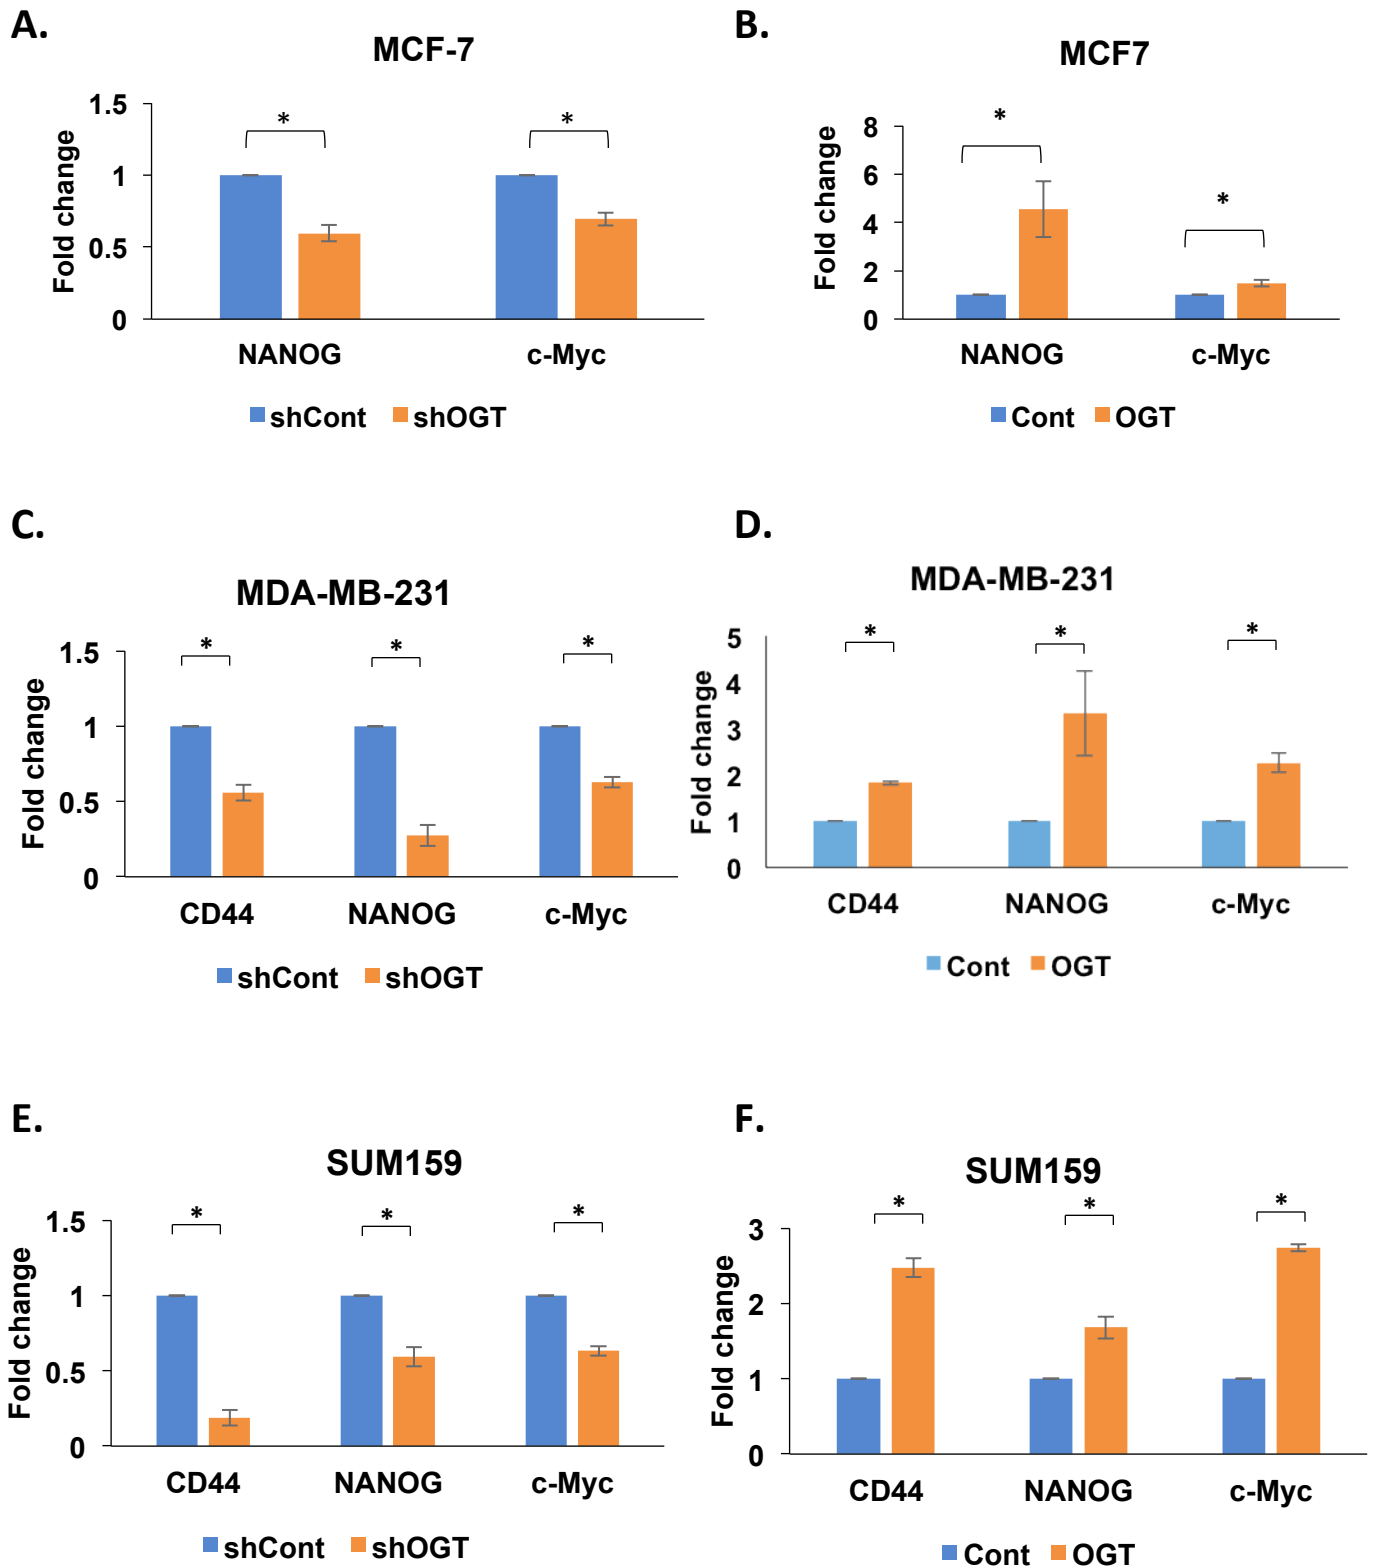

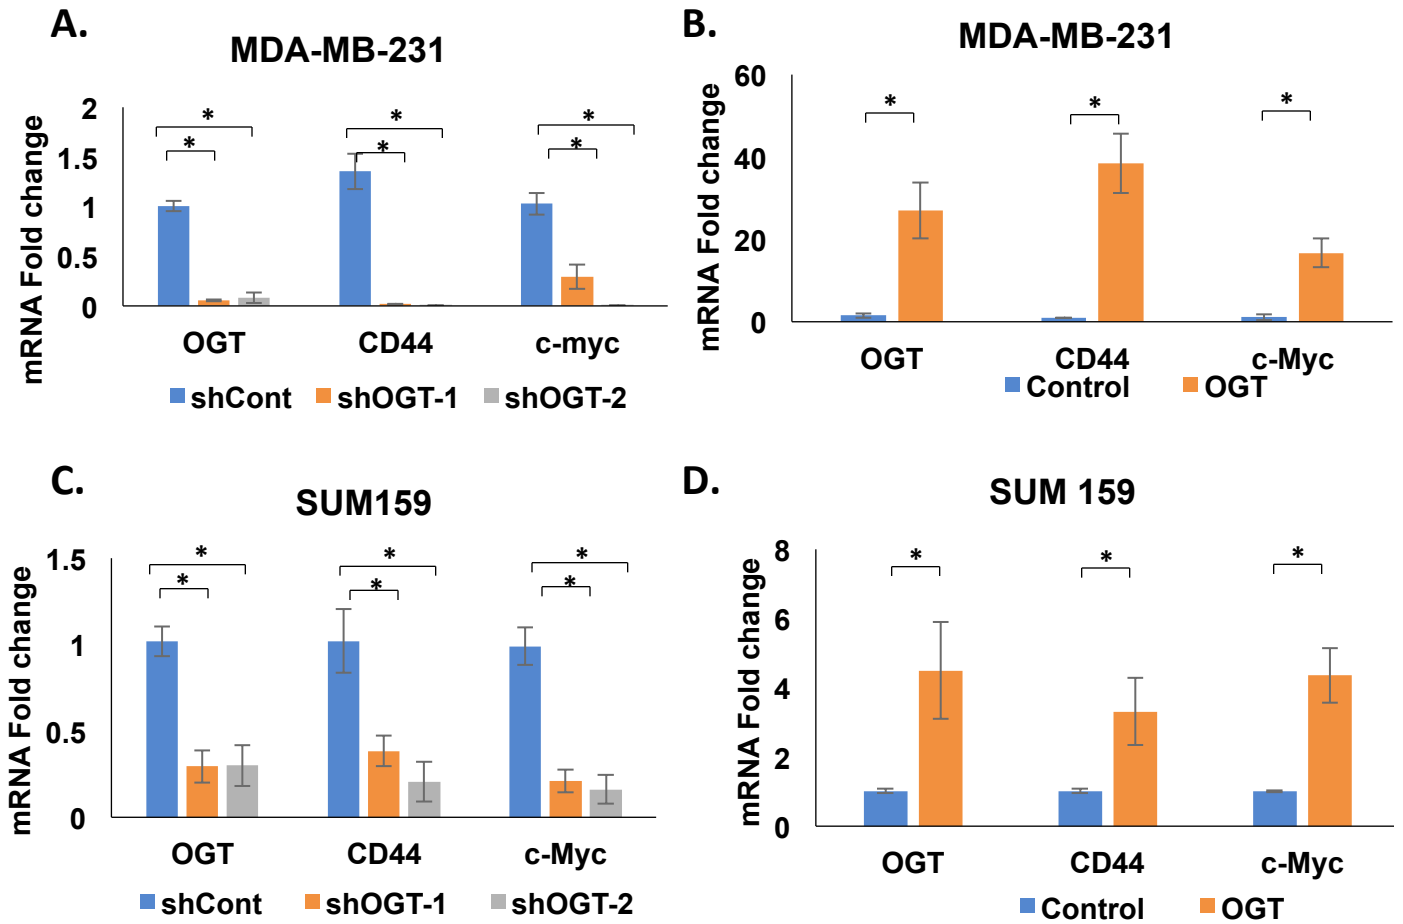

DEGs Number of The Most Enriched Pathway

A.

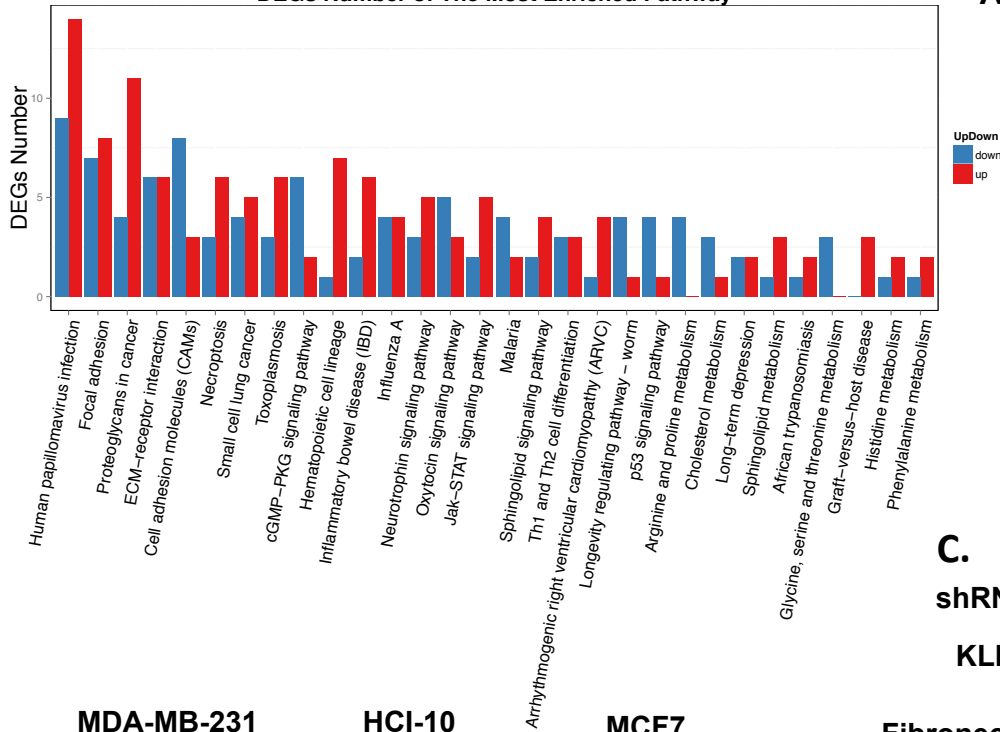

B.

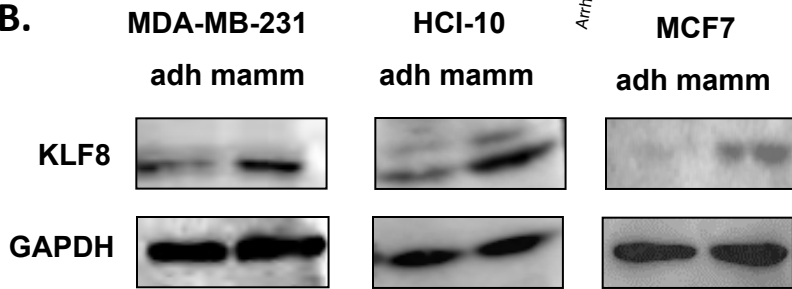

C.

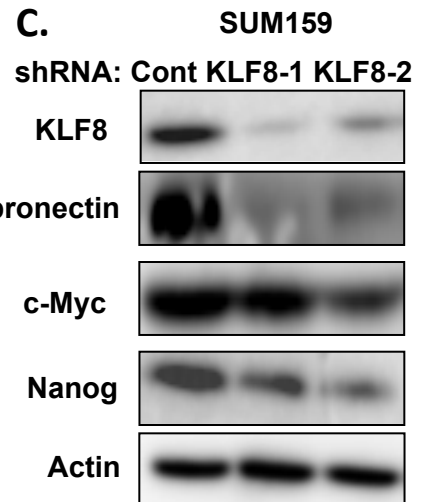

D.

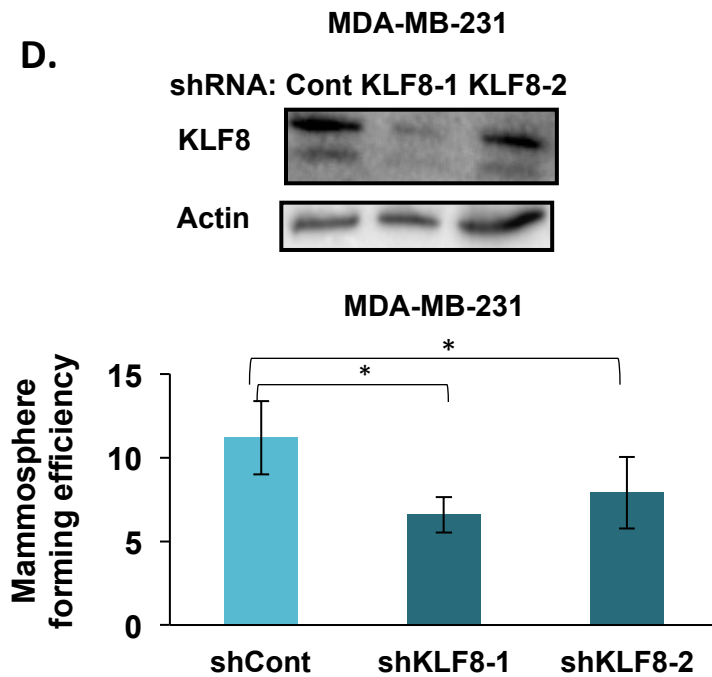

E.

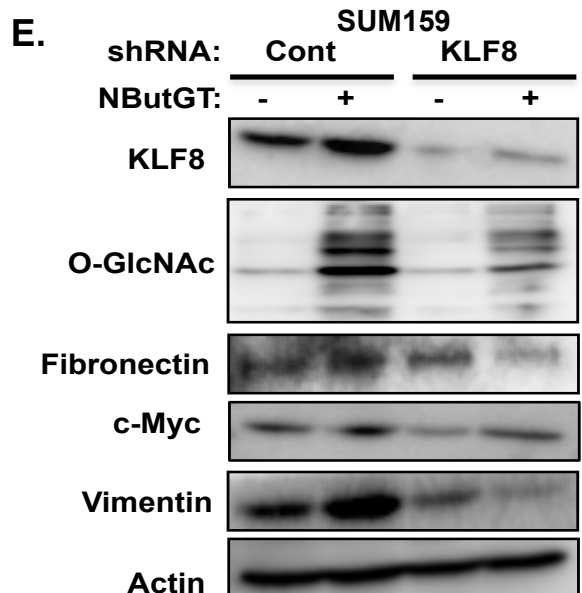

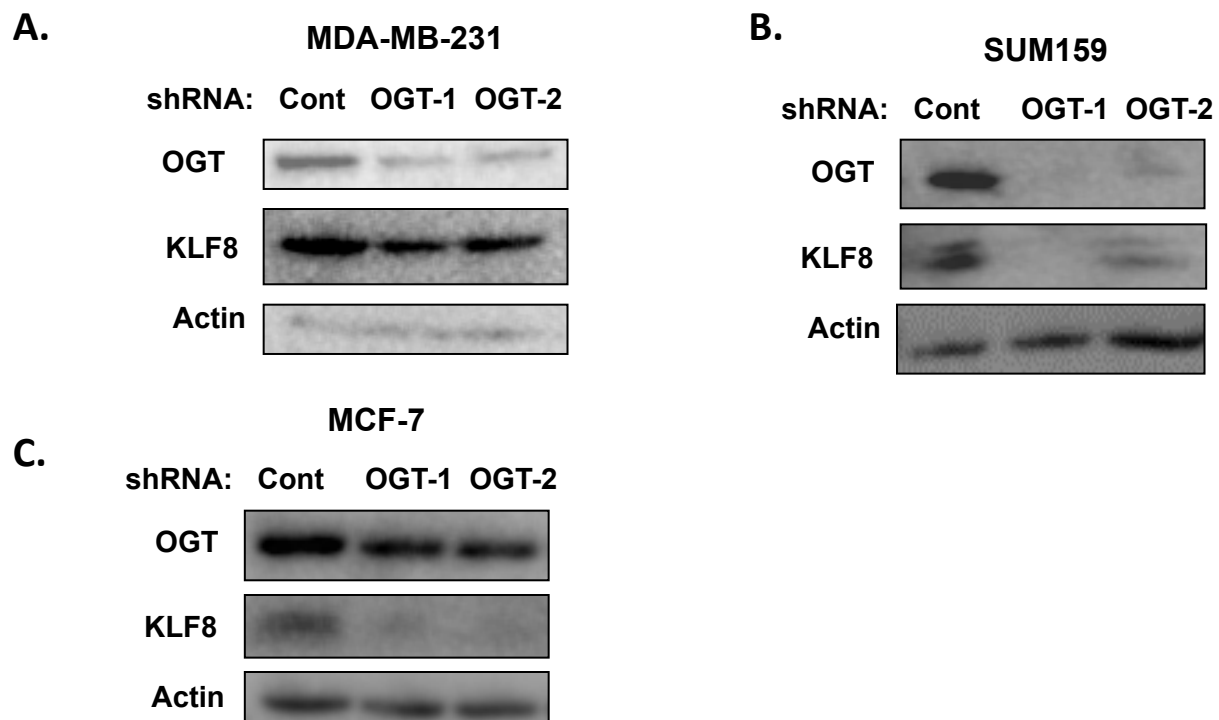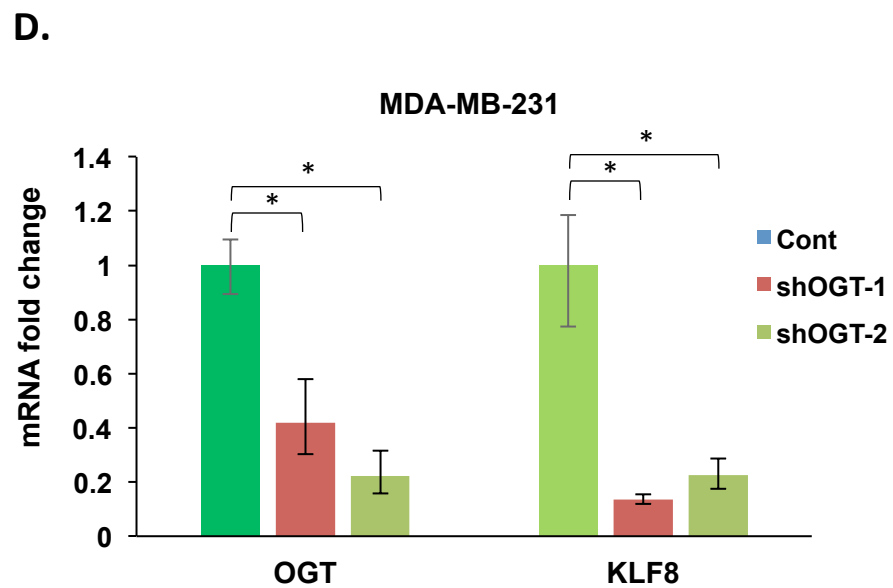



**A. Luminal A breast cancer**

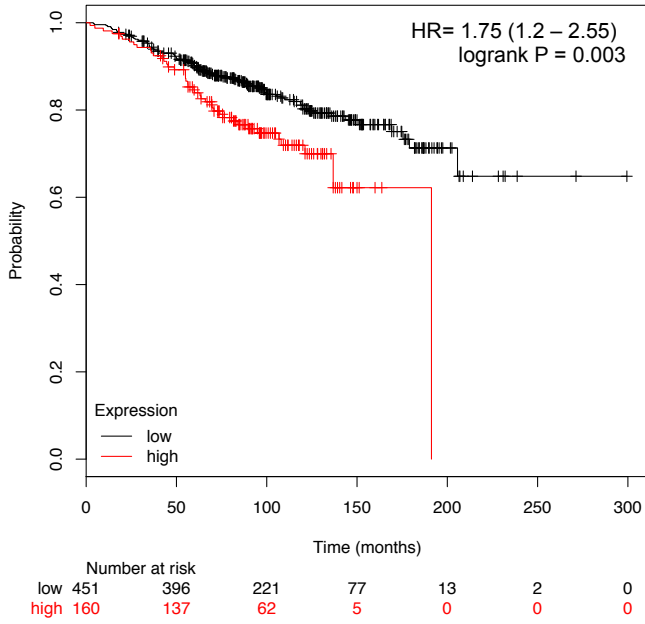

**C. Mesenchymal breast cancer**

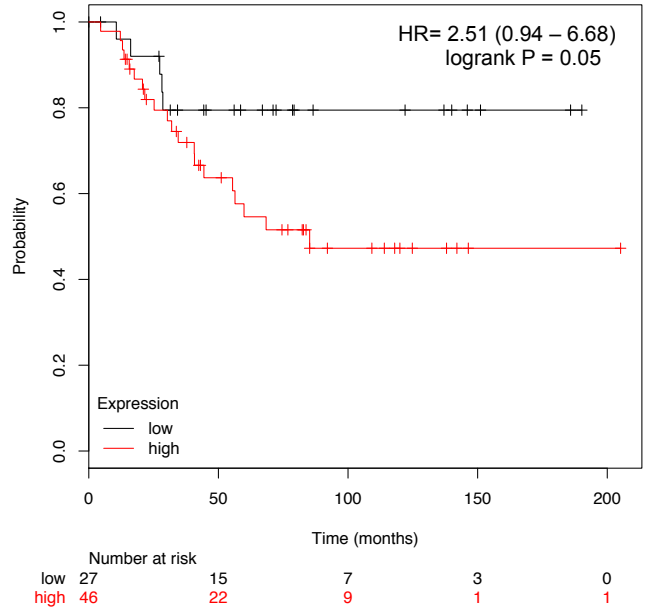

**B. HER2-positive breast cancer**

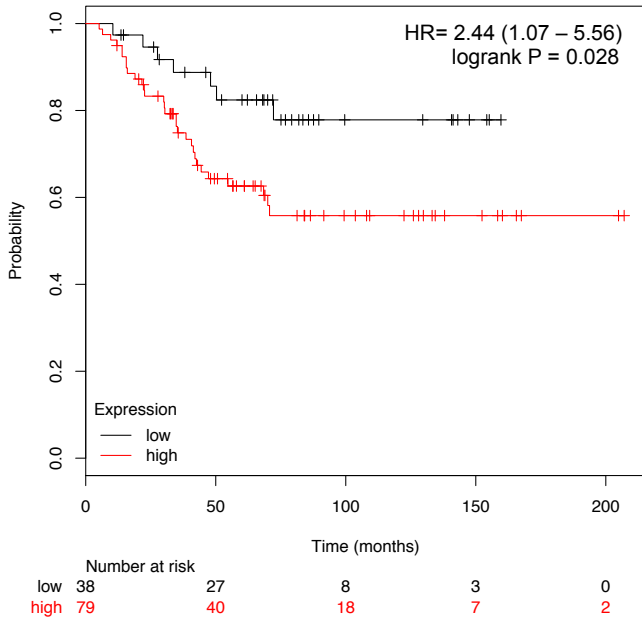

**D. Basal-like 2 breast cancer**

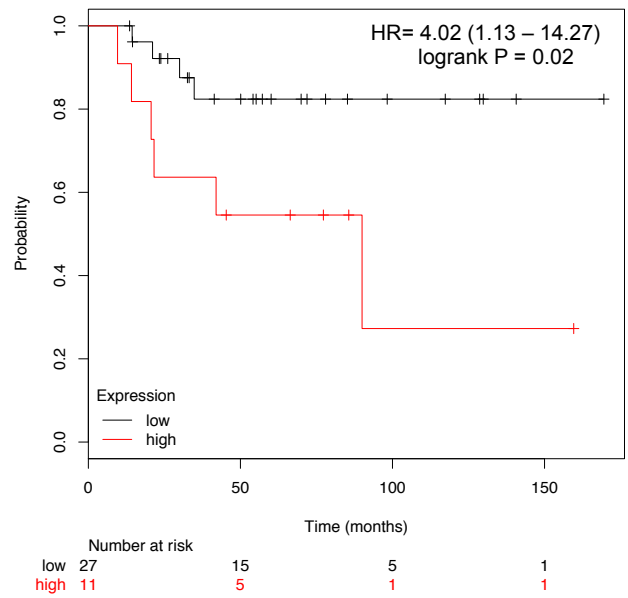

Supplement: NIHMS1551470-supplement-1.pdf [file NIHMS1551470-supplement-1.pdf]
